# Supplementary material for: Exosomes from adipose-derived stem cells promote chondrogenesis and suppress inflammation by upregulating miR-145 and miR-221
Source: PubMed Central journal article supplement — Mol Med Rep. 2020 Feb 7;21(4):1881–9. doi: 10.3892/mmr.2020.10982 (PMC7057766; doi:10.3892/mmr.2020.10982), 2020-02-07

Figure S1. Validation of miRNA mimics and inhibitors used in the present study. Periosteal cells were transfected with the indicated control oligos, mimics and inhibitors and (A) miR-221 and (B) miR-145 expression levels were evaluated by reverse transcription-quantitative PCR. \*\* $P < 0.01$ , \*\*\* $P < 0.001$  vs. NC. miR, microRNA; NC, negative control.

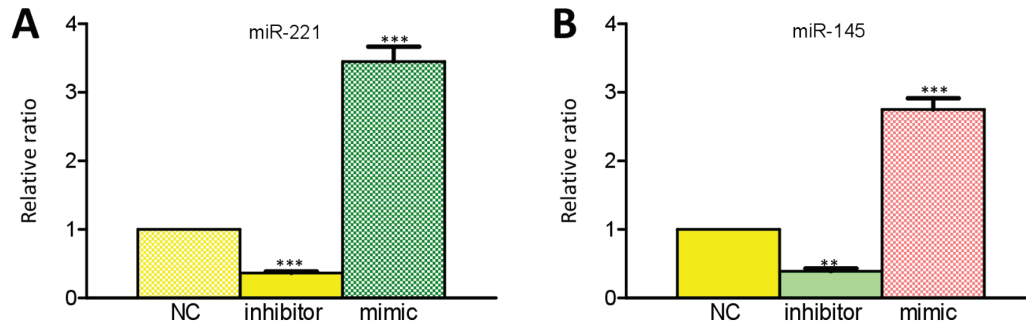

Supplement: Supplementary_Data.pdf [file Supplementary_Data.pdf]
